# Supplementary material for: Blocking C3d+/GFAP+ A1 Astrocyte Conversion with Semaglutide Attenuates Blood-Brain Barrier Disruption in Mice after Ischemic Stroke
Source: PubMed Central journal article supplement (PMC9116904; doi:10.14336/ad.2021.1029), 2022-06-01
Supplement: AD-13-3-943-s.pdf [file AD-13-3-943-s.pdf]

## SUPPLEMENTARY DATA

# **Blocking C3d<sup>+</sup>/GFAP<sup>+</sup> A1 Astrocyte Conversion with Semaglutide Attenuates Blood-Brain Barrier Disruption in Mice after Ischemic Stroke**

**Qi Zhang<sup>1,#</sup>, Chang Liu<sup>1,#</sup>, Rubing Shi<sup>1</sup>, Shiyi Zhou<sup>1</sup>, Huimin Shan<sup>1</sup>, Lidong Deng<sup>1</sup>, Tingting Chen<sup>1</sup>, Yiyao Guo<sup>1</sup>, Zhijun Zhang<sup>1</sup>, Guo-Yuan Yang<sup>1,2</sup>, Yongting Wang<sup>1\*</sup>, Yaohui Tang<sup>1\*</sup>**

# SUPPLEMENTARY DATA

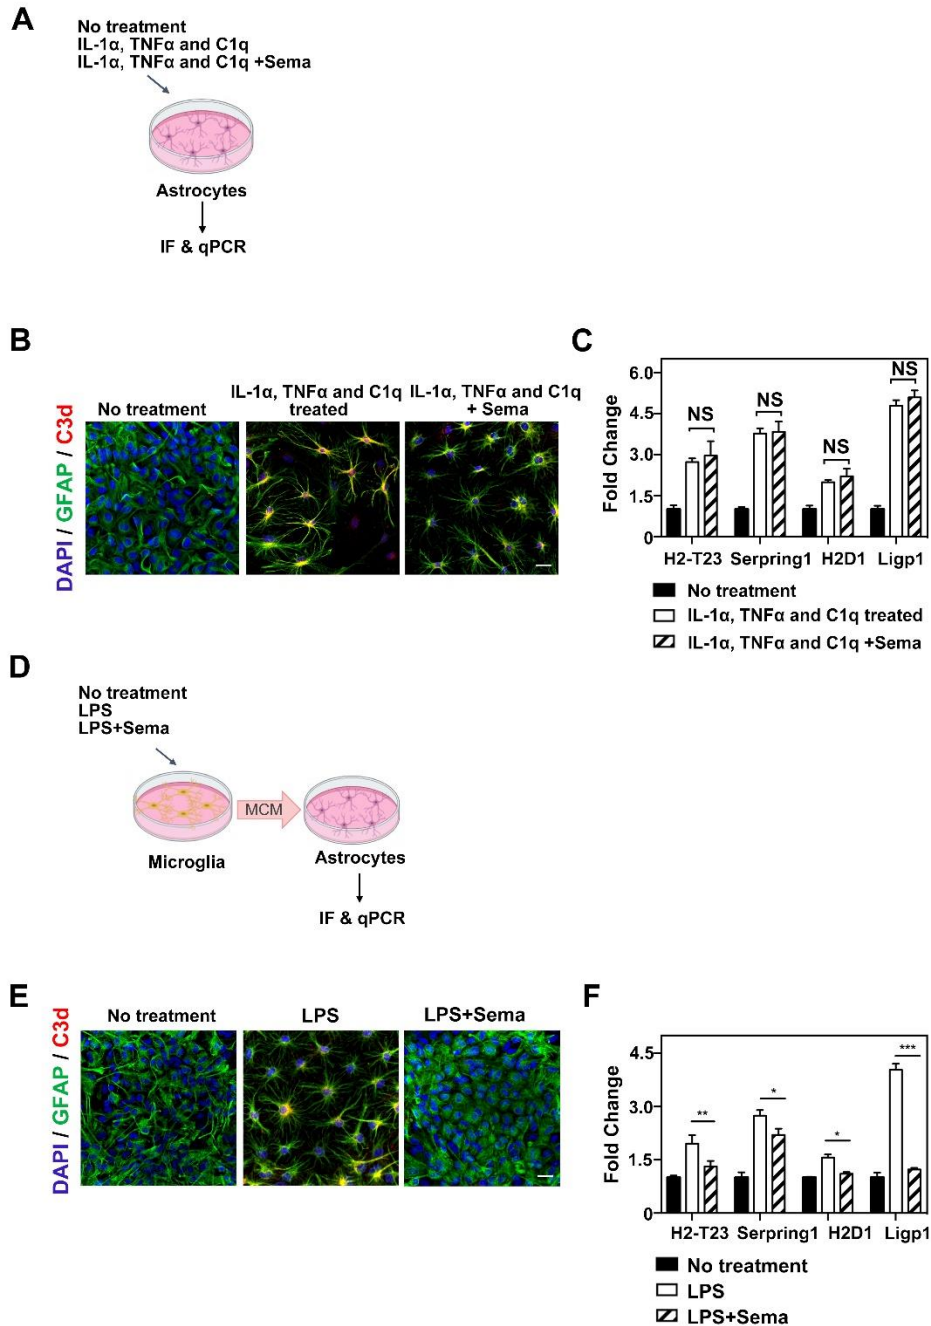

**Supplementary Figure 1. Semaglutide treatment did not directly prevent IL-1 $\alpha$ , TNF $\alpha$  and C1q induced phenotype change of astrocyte.** **A.** Astrocytes were treated with IL-1 $\alpha$ +TNF $\alpha$ +C1q or IL-1 $\alpha$ +TNF $\alpha$ +C1q+semaglutide for 24 hours and immunocytochemistry and real-time PCR were performed. **B.** Immunostaining of C3d<sup>+</sup>/GFAP<sup>+</sup> cells (C3d in red color; GFAP in green color; DAPI in blue color). Scale bar=25  $\mu$ m. **C.** Bar graph showed the mRNA levels of C3d<sup>+</sup>/GFAP<sup>+</sup> cells related genes H2-T23, Serpring1, H2D1 and Ligp1 expression after IL-1 $\alpha$ +TNF $\alpha$ +C1q or IL-1 $\alpha$ +TNF $\alpha$ +C1q+semaglutide treatment. Data are mean  $\pm$  SEM. n=3 per group. NS,  $p > 0.05$ . **D.** Astrocytes were treated with the medium derived from LPS stimulated microglia or LPS+semaglutide stimulated microglia for 24 hours and the immunocytochemistry and real-time PCR were performed. **E.** Immunostaining of C3d<sup>+</sup>/GFAP<sup>+</sup> cells (C3d in red color; GFAP in green color; DAPI in blue color). Scale bar=25  $\mu$ m. **F.** Bar graph showed the mRNA levels of C3d<sup>+</sup>/GFAP<sup>+</sup> cells related genes H2-T23, Serpring1, H2D1 and Ligp1 expression after treatment with the medium derived from LPS stimulated microglia or LPS+semaglutide stimulated microglia. Data are mean $\pm$ SEM. n=3 per group. \*,  $p < 0.05$ ; \*\*,  $p < 0.01$ ; \*\*\*,  $p < 0.001$ .

## SUPPLEMENTARY DATA

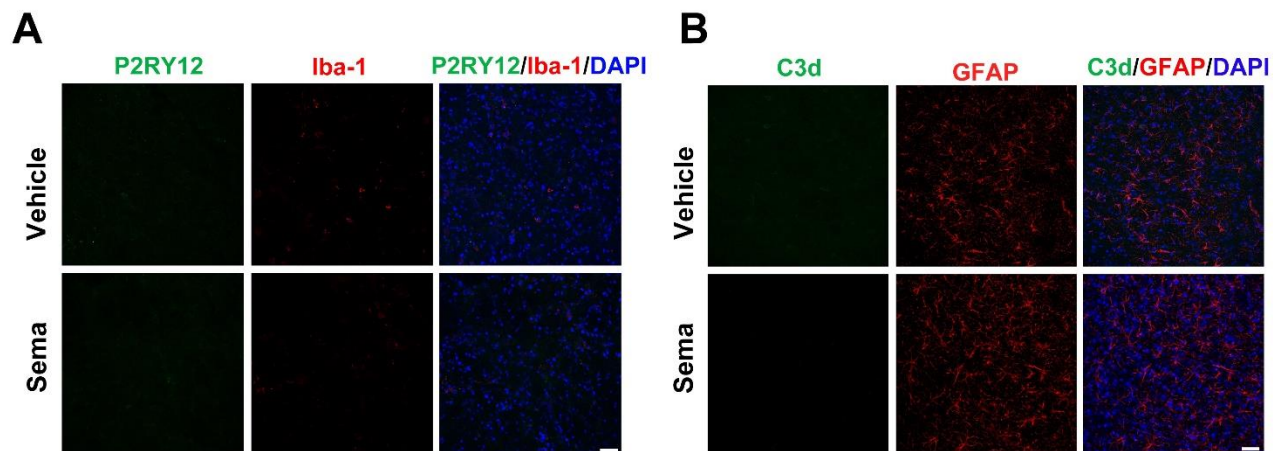

**Supplementary Figure 2. The formation of C3d+/GFAP+ reactive astrocytes are induced by activated microglia. A.** Photomicrographs showed that P2RY12<sup>+</sup>/Iba-1<sup>+</sup> cells (P2RY12 in green color; Iba-1 In red color; DAPI in blue color) in the ipsilateral hemisphere of the perifocal area in tMCAO mice and semaglutide treated tMCAO mice. Scale bar=75  $\mu$ m. **B.** Immunofluorescence images showed C3d<sup>+</sup>/GFAP<sup>+</sup> cells (C3d in red color; GFAP in green color; DAPI in blue color) after microglial depletion. Scale bar=75  $\mu$ m.

# SUPPLEMENTARY DATA

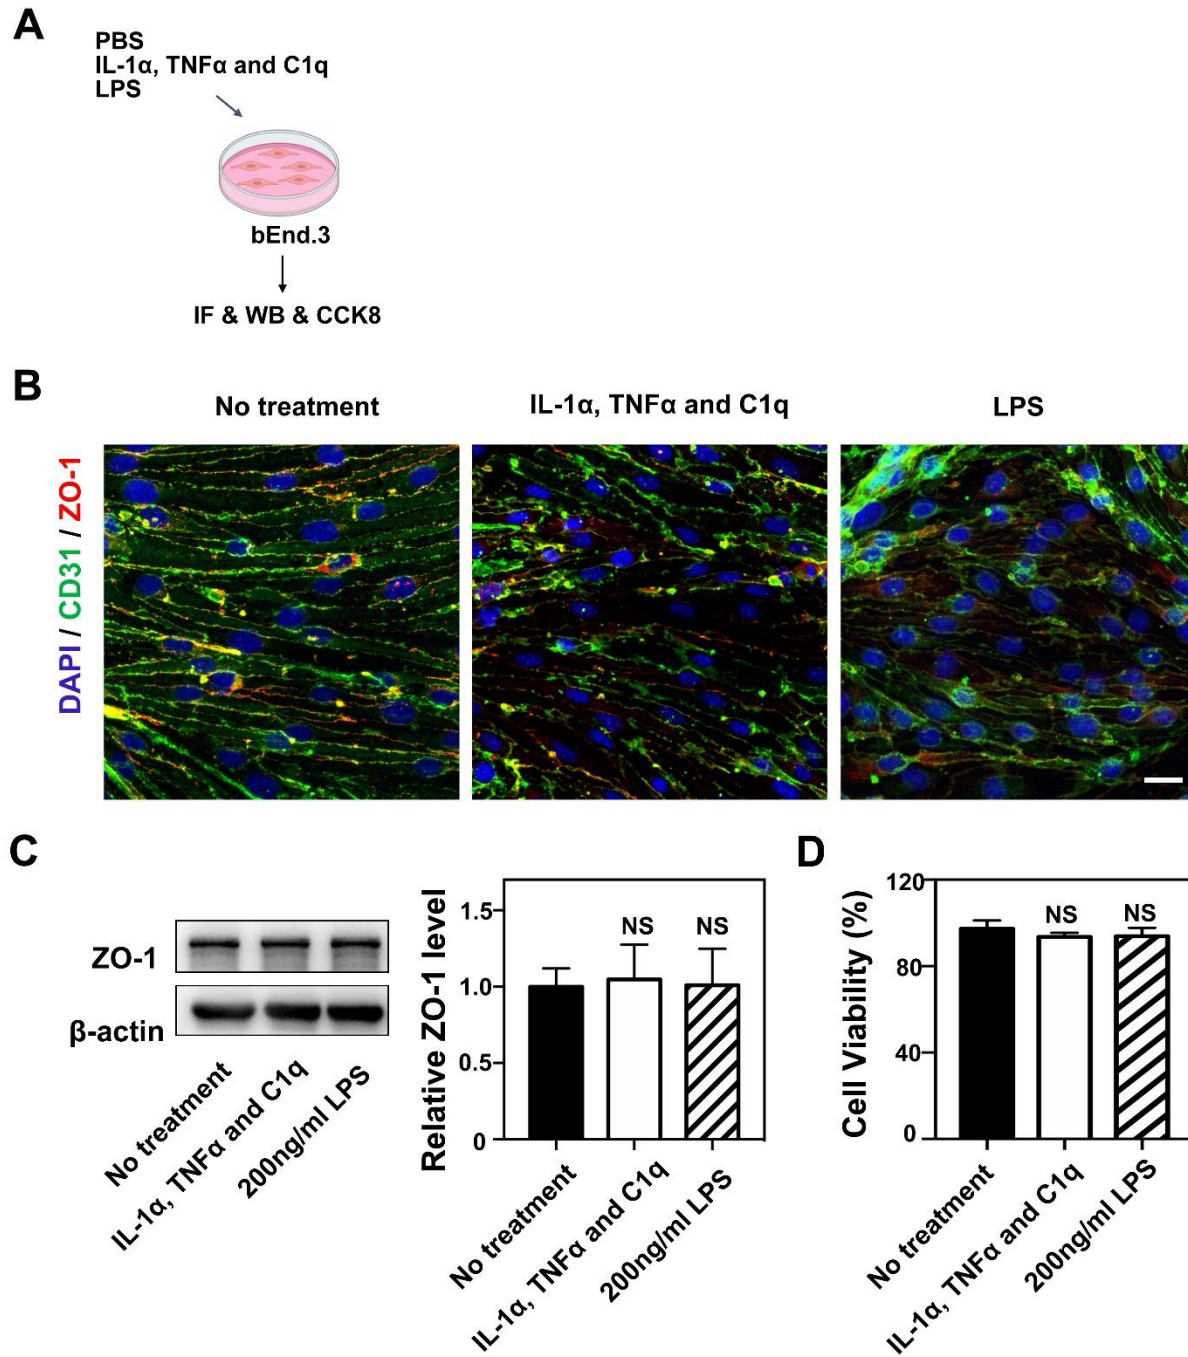

**Supplementary Figure 3. IL-1 $\alpha$  (3 ng/ml), TNF $\alpha$  (30 ng/ml) and C1q (400 ng/ml) or LPS (200 ng/ml) treatment did not affect the tight junction integrity and viability of bEnd.3 cells. A.** bEnd.3 cells were treated with IL-1 $\alpha$ +TNF $\alpha$ +C1q or LPS (200 ng/ml) for 24 hours, then immunocytochemistry and western blot were performed. **B.** Immunostaining of ZO-1/CD31 cells (ZO-1 in red color; CD31 in green color; DAPI in blue color). Scale bar=25  $\mu$ m. **C.** Western blot of ZO-1 in bEnd.3 cells. Bar graph showed ZO-1 level in bEnd.3 cells. Data are mean  $\pm$  SEM. n=3 per group. NS,  $p>0.05$ . **D.** CCK8 assay in bEnd.3 cells in no treatment group or treated with IL-1 $\alpha$ +TNF $\alpha$ +C1q or 200 ng/ml LPS.

SUPPLEMENTARY DATA

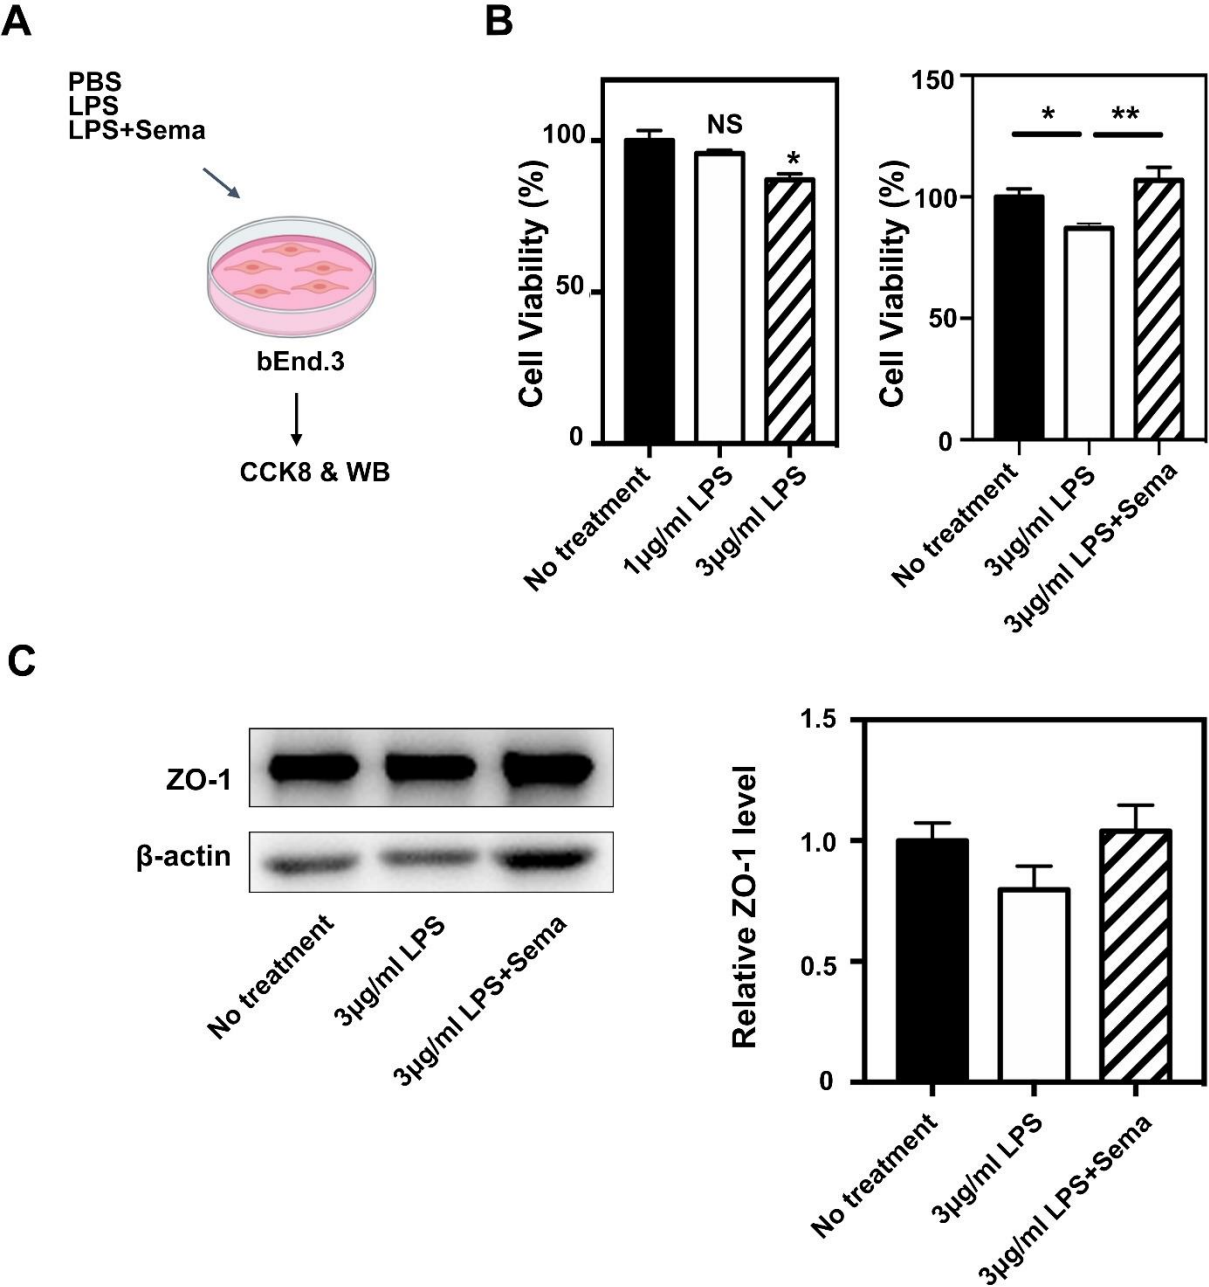

**Supplementary Figure 4. Sema3 treatment increased TJ integrity of bEnd.3 cells exposed to 3µg/ml LPS.** **A.** bEnd.3 cells were treated with LPS or LPS+sema3 for 24 hours, then CCK-8 and western blot were performed. **B.** CCK-8 assay showed the viability of bEnd.3 cells exposed to different concentration of LPS (1µg/ml and 3µg/ml). Data are mean ± SEM. n=8 per group. \*,  $p < 0.05$ ; \*\*,  $p < 0.01$ . **C.** Western blot data showed the expression of ZO-1 in bEnd.3 cells treated with 3µg/ml LPS or 3µg/ml LPS+sema3. Data are mean ± SEM. n=3 per group.

## SUPPLEMENTARY DATA

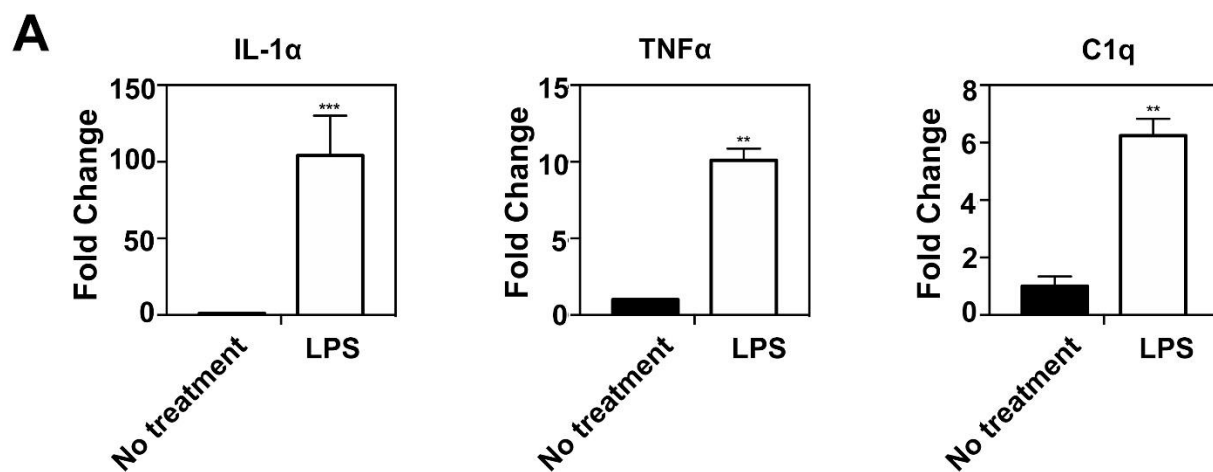

**Supplementary Figure 5. LPS treatment increased the expression of IL-1 $\alpha$ , TNF $\alpha$  and C1q in primary murine microglia. A.** Bar graph showed the expression of IL-1 $\alpha$ , TNF $\alpha$  and C1q in microglia after LPS treatment. Data are mean  $\pm$  SEM. n=3 per group. \*\*,  $p < 0.01$ ; \*\*\*,  $p < 0.001$ .
